# Supplementary material for: Influence of nitrosyl coordination on the binding mode of quinaldate in selective ruthenium frameworks. Electronic structure and reactivity aspects
Source: Royal Society of Chemistry journal article supplement (doi:10.1039/c2ra00953f), 2012-01-01
Supplement: c2ra00953f.pdf [file c2ra00953f.pdf]

## **Electronic Supplementary Information**

**Influence of nitrosyl coordination on the binding mode of quinaldate in selective ruthenium frameworks. Electronic structure and reactivity aspects**

**Abhishek Dutta Chowdhury, Prinaka De, Shaikh M. Mobin, and Goutam Kumar**

**Lahiri\***

*Department of Chemistry, IIT Bombay, Powai, Mumbai-400076, India, Fax: 91-022-2572-3480, E-mail: [lahiri@chem.iitb.ac.in](mailto:lahiri@chem.iitb.ac.in)*

**Table S1** Comparison of DFT calculated selected bond distances and bond angles of  $\{\text{RuNO}\}^n$  ( $n = 6,7$ )

| Bond distance<br>(Å)/Bond angle<br>(°) | [1] <sup>+</sup> | <b>1</b> | [2] <sup>2+</sup> | [2] <sup>+</sup> |
|----------------------------------------|------------------|----------|-------------------|------------------|
| Ru-N(1)                                | –                | –        | 2.19              | 2.21             |
| Ru-N(2)                                | 2.11             | 2.10     | 2.14              | 2.13             |
| Ru-N(3)                                | 2.03             | 2.02     | 2.02              | 1.99             |
| Ru-N(4)                                | 2.11             | 2.11     | 2.13              | 2.13             |
| Ru-N(5)                                | 1.79             | 1.93     | 1.80              | 1.92             |
| Ru-O(1)                                | 2.05             | 2.10     | 1.97              | 2.06             |
| Ru-Cl                                  | 2.44             | 2.46     | –                 | –                |
| C(1)-O(1)                              | 1.30             | 1.29     | 1.34              | 1.31             |
| C(1)-O(2)                              | 1.24             | 1.24     | 1.21              | 1.22             |
| N(5)-O(3)                              | 1.14             | 1.18     | 1.15              | 1.18             |
| N(1)-Ru-N(3)                           | –                | –        | 160.82            | 166.11           |
| N(2)-Ru-N(4)                           | 156.32           | 157.16   | 158.22            | 158.00           |
| O(1)-Ru-N(5)                           | 97.80            | 94.48    | 175.03            | 177.37           |
| N(3)-Ru-N(5)                           | 175.95           | 177.82   | 94.98             | 90.44            |
| Cl-Ru-O(1)                             | 171.59           | 175.01   | –                 | –                |
| N(5)-Ru-N(2)                           | 100.80           | 100.74   | 90.86             | 91.96            |
| N(5)-Ru-N(3)                           | 175.95           | 177.82   | 94.98             | 90.44            |
| N(5)-Ru-N(4)                           | 102.88           | 102.09   | 95.83             | 92.37            |
| N(5)-Ru-N(1)                           | –                | –        | 104.18            | 103.45           |
| N(1)-Ru-N(4)                           | –                | –        | 99.17             | 92.37            |
| N(3)-Ru(1)-O(1)                        | 86.11            | 87.63    | 81.61             | 86.94            |
| Ru-N(5)-O(3)                           | 170.25           | 141.85   | 174.02            | 139.69           |

**Table S2(a)** Selected molecular orbital composition for [1]<sup>+</sup> in S=0 state

| MOs    | Energy | Composition (%) |    |      |    |    |
|--------|--------|-----------------|----|------|----|----|
|        |        | Ru              | NO | trpy | L  | Cl |
| LUMO+6 | -4.39  | 7               | 0  | 91   | 1  | 1  |
| LUMO+5 | -4.45  | 8               | 0  | 92   | 0  | 1  |
| LUMO+4 | -4.48  | 42              | 3  | 49   | 4  | 2  |
| LUMO+3 | -5.35  | 20              | 34 | 44   | 2  | 0  |
| LUMO+2 | -5.47  | 2               | 0  | 98   | 0  | 0  |
| LUMO+1 | -5.88  | 23              | 63 | 13   | 1  | 0  |
| LUMO   | -6.07  | 11              | 42 | 39   | 5  | 3  |
| HOMO   | -8.35  | 1               | 0  | 0    | 99 | 0  |
| HOMO-1 | -8.88  | 7               | 0  | 0    | 87 | 6  |
| HOMO-2 | -9.04  | 8               | 0  | 1    | 84 | 7  |
| HOMO-3 | -9.09  | 28              | 1  | 2    | 27 | 42 |
| HOMO-4 | -9.40  | 12              | 5  | 2    | 5  | 76 |
| HOMO-5 | -9.92  | 4               | 0  | 2    | 90 | 4  |
| HOMO-6 | -10.04 | 18              | 1  | 18   | 33 | 30 |

**Table S2(b)** Selected molecular orbital composition for [2]<sup>2+</sup> in S=0 state

| MOs    | Energy | Composition (%) |    |      |    |
|--------|--------|-----------------|----|------|----|
|        |        | Ru              | NO | trpy | L  |
| LUMO+6 | -7.42  | 46              | 12 | 22   | 20 |
| LUMO+5 | -7.87  | 31              | 1  | 28   | 40 |
| LUMO+4 | -7.92  | 32              | 1  | 28   | 39 |
| LUMO+3 | -8.33  | 2               | 1  | 97   | 0  |
| LUMO+2 | -8.64  | 8               | 6  | 84   | 2  |
| LUMO+1 | -9.41  | 26              | 65 | 5    | 4  |
| LUMO   | -9.43  | 24              | 62 | 8    | 6  |
| HOMO   | -12.16 | 4               | 0  | 1    | 95 |
| HOMO-1 | -12.70 | 0               | 0  | 1    | 99 |
| HOMO-2 | -12.80 | 3               | 2  | 0    | 95 |
| HOMO-3 | -13.07 | 1               | 1  | 97   | 1  |
| HOMO-4 | -13.29 | 17              | 10 | 12   | 61 |
| HOMO-5 | -13.81 | 58              | 2  | 15   | 25 |
| HOMO-6 | -13.83 | 12              | 7  | 75   | 6  |

**Table S3(a)** Selected molecular orbital composition for **1** in S=1/2 state

| MOs    | Energy | Composition of $\alpha$ -MO.s (%) |    |      |    |    |
|--------|--------|-----------------------------------|----|------|----|----|
|        |        | Ru                                | NO | trpy | L  | Cl |
| LUMO+2 | -1.30  | 2                                 | 1  | 45   | 52 | 0  |
| LUMO+1 | -2.24  | 3                                 | 0  | 97   | 0  | 0  |
| LUMO   | -2.29  | 12                                | 5  | 82   | 0  | 1  |
| SOMO   | -4.02  | 26                                | 43 | 17   | 10 | 4  |
| HOMO-1 | -5.091 | 52                                | 1  | 5    | 10 | 32 |
| HOMO-2 | -5.663 | 18                                | 12 | 4    | 16 | 50 |
| MOs    | Energy | Composition of $\beta$ -MO.s (%)  |    |      |    |    |
|        |        | Ru                                | NO | trpy | L  | Cl |
| LUMO+2 | -1.30  | 3                                 | 2  | 13   | 82 | 0  |
| LUMO+1 | -2.22  | 2                                 | 0  | 98   | 0  | 0  |
| LUMO   | -2.36  | 3                                 | 44 | 50   | 2  | 1  |
| HOMO   | -5.05  | 53                                | 0  | 5    | 11 | 31 |
| HOMO-1 | -5.43  | 38                                | 7  | 0    | 5  | 50 |
| HOMO-2 | -5.85  | 5                                 | 4  | 1    | 90 | 0  |

**Table S3(b)** Selected molecular orbital composition for **[2]<sup>+</sup>** in S=1/2 state

| MO     | Energy | Composition of $\alpha$ -MO.s (%) |    |      |    |
|--------|--------|-----------------------------------|----|------|----|
|        |        | Ru                                | NO | trpy | QA |
| LUMO+2 | -4.72  | 3                                 | 0  | 2    | 95 |
| LUMO+1 | -5.18  | 1                                 | 1  | 97   | 1  |
| LUMO   | -5.42  | 3                                 | 5  | 90   | 2  |
| SOMO   | -7.16  | 32                                | 51 | 5    | 12 |
| HOMO-1 | -8.97  | 43                                | 4  | 9    | 44 |
| HOMO-2 | -9.05  | 22                                | 10 | 3    | 65 |
| MO     | Energy | Composition of $\beta$ -MO.s (%)  |    |      |    |
|        |        | Ru                                | NO | trpy | QA |
| LUMO+2 | -4.74  | 3                                 | 3  | 2    | 92 |
| LUMO+1 | -5.18  | 1                                 | 1  | 98   | 0  |
| LUMO   | -5.42  | 3                                 | 91 | 4    | 2  |
| HOMO   | -8.70  | 47                                | 13 | 6    | 34 |
| HOMO-1 | -8.96  | 48                                | 1  | 8    | 43 |
| HOMO-2 | -9.07  | 17                                | 7  | 2    | 75 |

**Table S4(a)** Selective Kohn-Sham orbital contours of  $[1]^+$  and **1**

| $[1]^+$           |                  |                   |
|-------------------|------------------|-------------------|
|                   |                  |                   |
| LUMO + 1          | LUMO             | HOMO              |
|                   |                  |                   |
| HOMO-2            | HOMO-3           | HOMO-6            |
| <b>1</b>          |                  |                   |
|                   |                  |                   |
| LUMO ( $\alpha$ ) | LUMO ( $\beta$ ) | SOMO ( $\alpha$ ) |

**Table S4(b)** Selective Kohn-Sham orbital contours of  $[2]^{2+}$  and  $[2]^+$

| $[2]^{2+}$         |                  |                   |
|--------------------|------------------|-------------------|
|                    |                  |                   |
| LUMO + 3           | LUMO + 1         | LUMO              |
|                    |                  |                   |
| HOMO               | HOMO-4           | HOMO-5            |
| $[2]^+$            |                  |                   |
|                    |                  |                   |
| LUMO+1 ( $\beta$ ) | LUMO ( $\beta$ ) | SOMO ( $\alpha$ ) |

**Table S5** TD-DFT (B3LYP/CPCM) results for  $[1]^+$ , **1**

|          | E<br>(eV) | $\lambda$ (nm) | $f$    | Transition                                    | Character                                                               |
|----------|-----------|----------------|--------|-----------------------------------------------|-------------------------------------------------------------------------|
| $[1]^+$  | 2.73      | 454.20         | 0.0063 | HOMO-3→LUMO<br>(0.31)                         | Ru <sup>II</sup> (d $\pi$ )/L( $\pi$ )→NO <sup>+</sup> ( $\pi^*$ )      |
|          |           |                |        | HOMO-2→LUMO<br>(0.31)                         |                                                                         |
|          | 3.42      | 363.01         | 0.0120 | HOMO-6→LUMO<br>(0.47)                         | Ru <sup>II</sup> (d $\pi$ )/L( $\pi$ )→NO <sup>+</sup> ( $\pi^*$ )      |
|          | 3.68      | 337.27         | 0.0146 | HOMO-5→LUMO+3<br>(0.50)                       | L( $\pi$ )→NO <sup>+</sup> ( $\pi^*$ )/trpy( $\pi^*$ )                  |
|          | 3.77      | 328.67         | 0.0104 | HOMO-8→LUMO+1<br>(0.47)                       | trpy( $\pi$ )→NO <sup>+</sup> ( $\pi^*$ )                               |
|          | 4.08      | 304.00         | 0.0138 | HOMO-9→LUMO+1<br>(0.55)                       | trpy( $\pi$ )/Cl( $\pi$ )→NO <sup>+</sup> ( $\pi^*$ )                   |
| <b>1</b> | 2.20      | 562.44         | 0.0017 | SOMO( $\alpha$ )→LUMO+1( $\alpha$ )<br>(0.92) | Ru <sup>II</sup> (d $\pi$ )/NO <sup>•</sup> ( $\pi$ )→trpy( $\pi$<br>*) |
|          | 2.90      | 427.68         | 0.0014 | SOMO( $\alpha$ )→LUMO+6( $\alpha$ )<br>(0.61) | Ru <sup>II</sup> (d $\pi$ )/NO <sup>•</sup> ( $\pi$ )→trpy( $\pi$<br>*) |
|          | 3.34      | 371.06         | 0.0051 | SOMO( $\alpha$ )→LUMO+6( $\alpha$ )<br>(0.67) | Ru <sup>II</sup> (d $\pi$ )/NO <sup>•</sup> ( $\pi$ )→trpy( $\pi$<br>*) |
|          | 3.44      | 360.77         | 0.0046 | HOMO-4( $\beta$ )→LUMO( $\beta$ )<br>(0.75)   | L( $\pi$ )/Cl( $\pi$ )→trpy( $\pi^*$ )                                  |
|          | 3.73      | 332.16         | 0.0112 | HOMO-6( $\beta$ )→LUMO+5( $\beta$ )<br>(0.44) | L( $\pi$ )→trpy( $\pi^*$ )/NO <sup>•</sup> ( $\pi^*$ )                  |
|          | 3.87      | 320.27         | 0.0176 | HOMO-4( $\beta$ )→LUMO+1( $\beta$ )<br>(0.57) | L( $\pi$ )/Cl( $\pi$ )→trpy( $\pi^*$ )                                  |

**Table S6** TD-DFT (B3LYP/CPCM) results for  $[2]^{2+}$ ,  $[2]^+$

|            | E<br>(eV) | $\lambda$ (nm) | $f$    | Transition                                      | Character                                                          |
|------------|-----------|----------------|--------|-------------------------------------------------|--------------------------------------------------------------------|
| $[2]^{2+}$ | 3.58      | 346.21         | 0.0137 | HOMO→LUMO+5<br>(0.39)                           | Ru <sup>II</sup> (d $\pi$ )/L( $\pi$ )→NO <sup>+</sup> ( $\pi^*$ ) |
|            |           |                |        | HOMO→LUMO+3<br>(0.29)                           |                                                                    |
|            | 3.72      | 333.33         | 0.0242 | HOMO-5→LUMO<br>(0.38)                           | Ru <sup>II</sup> (d $\pi$ )/L( $\pi$ )→NO <sup>+</sup> ( $\pi^*$ ) |
|            | 4.23      | 292.70         | 0.0449 | HOMO-4→LUMO+2<br>(0.40)                         | L( $\pi$ )→trpy( $\pi^*$ )                                         |
|            | 4.42      | 280.35         | 0.0482 | HOMO-3→LUMO+2<br>(0.40)                         | L( $\pi$ )→trpy( $\pi^*$ )                                         |
| $[2]^+$    | 2.58      | 480.45         | 0.0032 | SOMO( $\alpha$ )→LUMO+2( $\alpha$ )<br>(0.96)   | Ru <sup>II</sup> (d $\pi$ )/NO <sup>•</sup> ( $\pi$ )→L( $\pi^*$ ) |
|            | 3.33      | 372.29         | 0.0027 | HOMO-4( $\alpha$ )→LUMO+1( $\alpha$ )<br>(0.50) | Ru <sup>II</sup> (d $\pi$ )/L( $\pi$ )→trpy( $\pi^*$ )             |
|            | 3.74      | 331.22         | 0.0186 | HOMO-2( $\beta$ )→LUMO+1( $\beta$ )<br>(0.40)   | QA( $\pi$ )→trpy( $\pi^*$ )                                        |
|            | 3.77      | 329.22         | 0.0116 | HOMO-2( $\beta$ )→LUMO+4( $\beta$ )<br>(0.25)   | QA( $\pi$ )→trpy( $\pi^*$ )                                        |

**Table S7** The selected bond order of  $\{\text{RuNO}\}^n$ , where  $n = 6,7$

|                            | N(5)-O(3) | Ru-N(5) | Ru-O(1) | Ru-N(3) | O(1)-C(1) | C(1)-O(2) |
|----------------------------|-----------|---------|---------|---------|-----------|-----------|
| [ <b>1</b> ] <sup>+</sup>  | 1.877     | 1.087   | 0.590   | 0.381   | 1.162     | 1.628     |
| <b>1</b>                   | 1.769     | 0.929   | 0.549   | 0.364   | 1.203     | 1.667     |
| [ <b>2</b> ] <sup>2+</sup> | 1.834     | 1.084   | 0.687   | 0.484   | 1.009     | 1.919     |
| [ <b>2</b> ] <sup>+</sup>  | 1.750     | 0.915   | 0.585   | 0.472   | 1.110     | 1.877     |



(a)

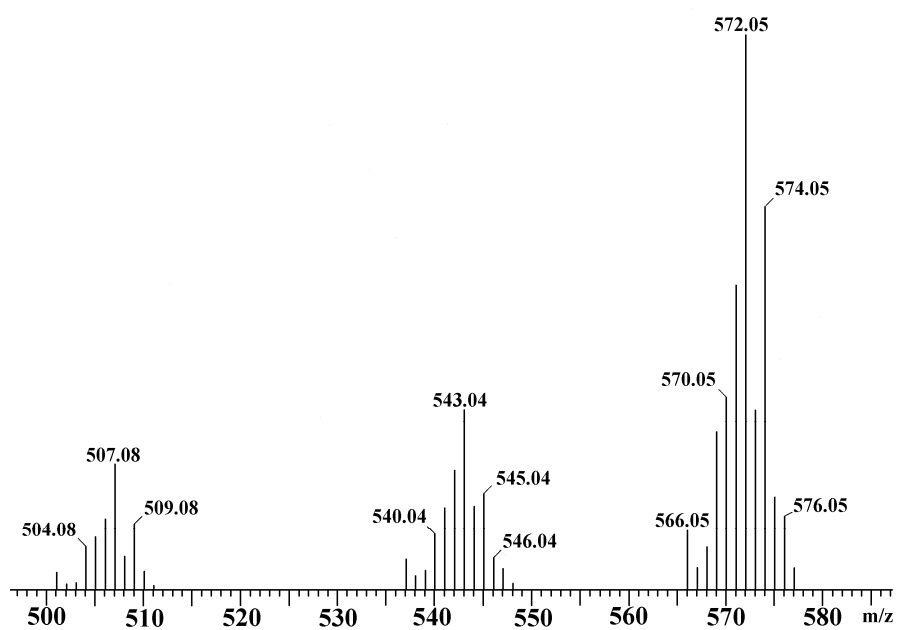

(b)

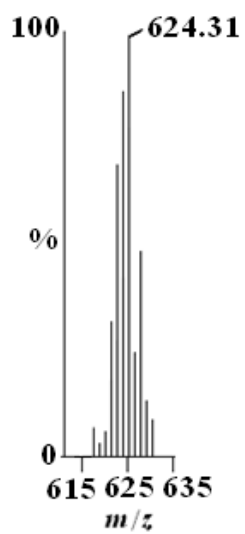

**Fig. S1** ESI-MS(+) spectra of (a) [1]BF<sub>4</sub> and (b) [2](BF<sub>4</sub>)<sub>2</sub> in CH<sub>3</sub>CN.

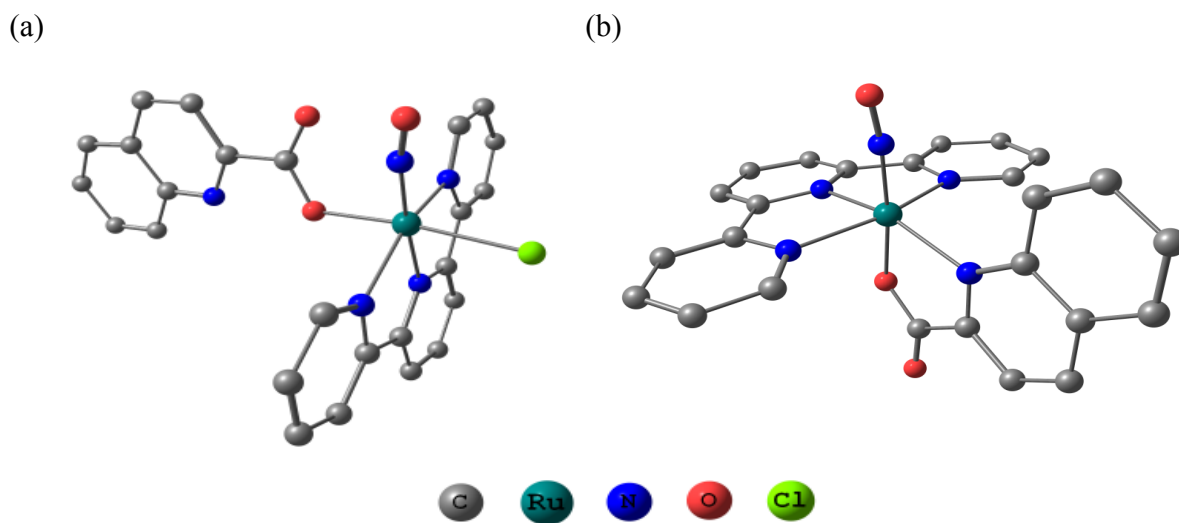

**Fig S2** The DFT optimized geometries of (a)  $[1]^+$  and (b)  $[2]^{2+}$ . The hydrogen atoms are omitted for clarity.

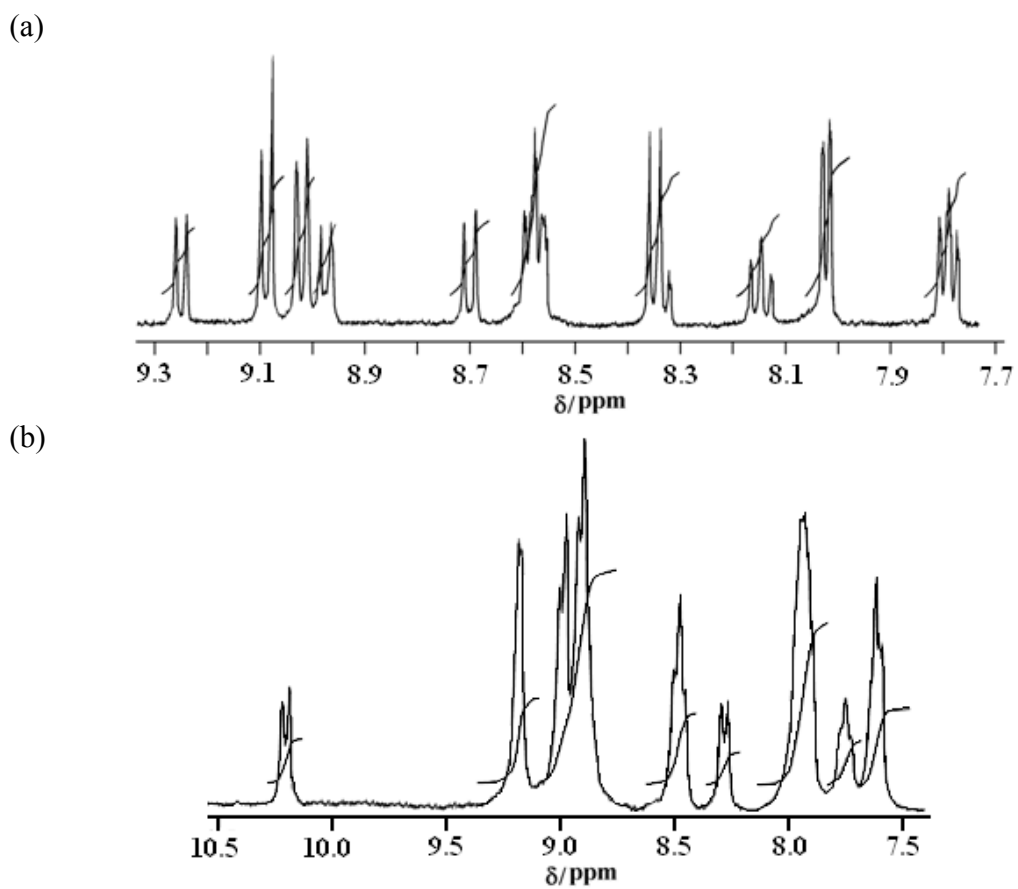

**Fig. S3**  $^1\text{H}$  NMR spectra of (a)  $[1]^+$  and (b)  $[2]^{2+}$  in  $(\text{CD}_3)_2\text{SO}$ .

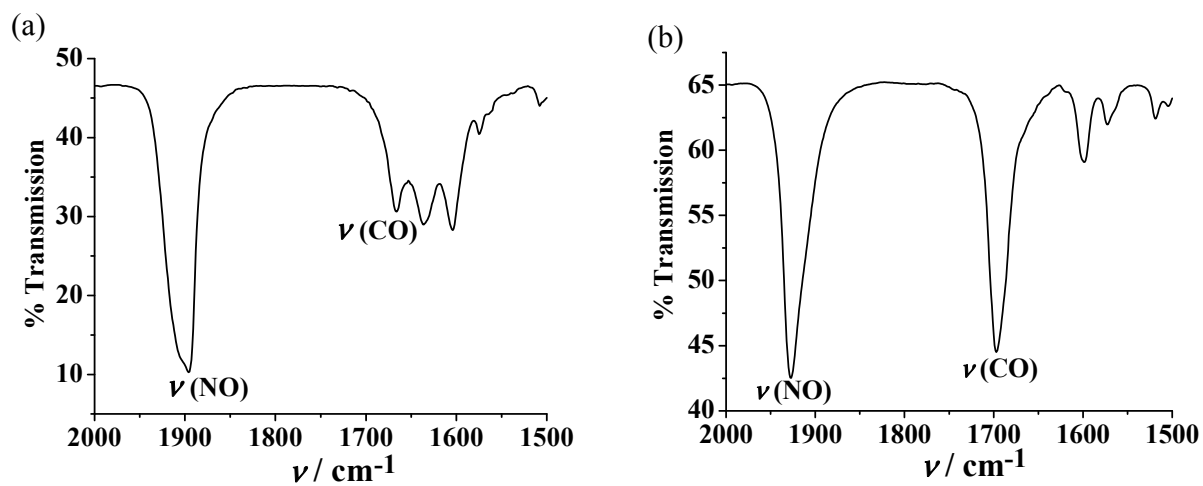

**Fig. S4** IR spectra (KBr disk) of (a)  $[1]\text{BF}_4$  and (b)  $[2](\text{BF}_4)_2$  in the region of 2000-1500  $\text{cm}^{-1}$ .

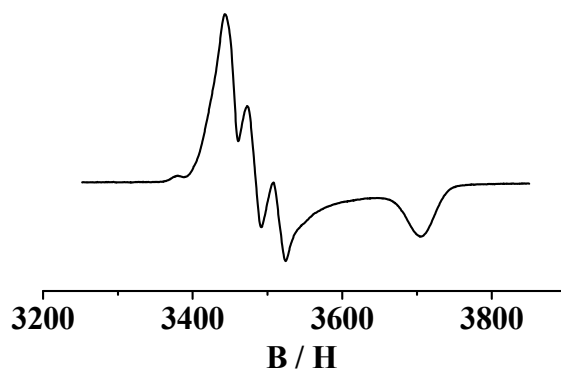

**Fig. S5** EPR spectrum of  $[2]^+$  in  $\text{CH}_3\text{CN}/0.1 \text{ M Bu}_4\text{NPF}_6$  solution at 110K.

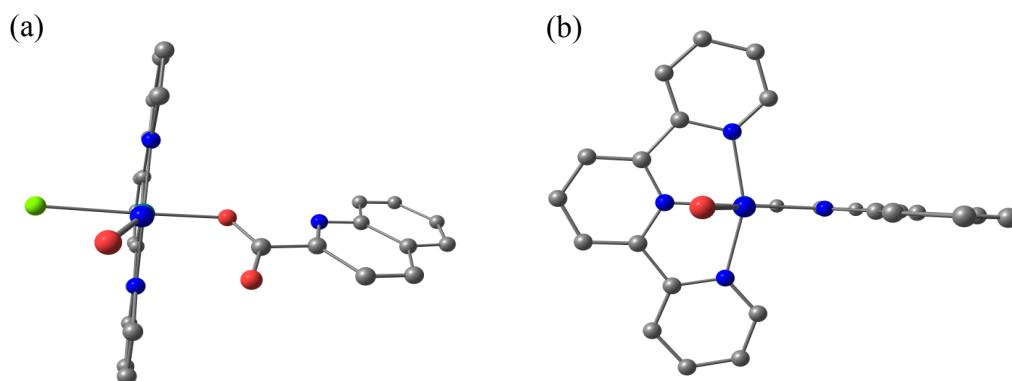

**Fig. S6** The optimized geometry of (a) *pseudo*-staggered **1** and (b) eclipsed [**2**]<sup>+</sup>.

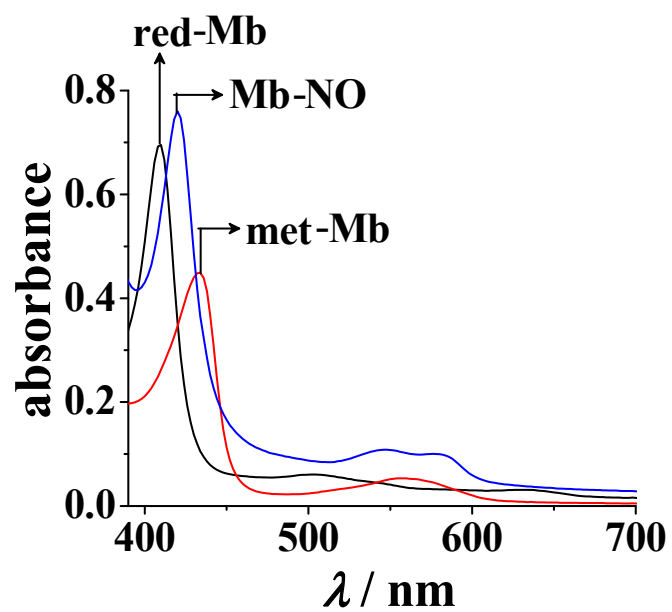

**Fig. S7** Absorption spectra of met-Mb, reduced Mb and Mb-NO adduct in water.

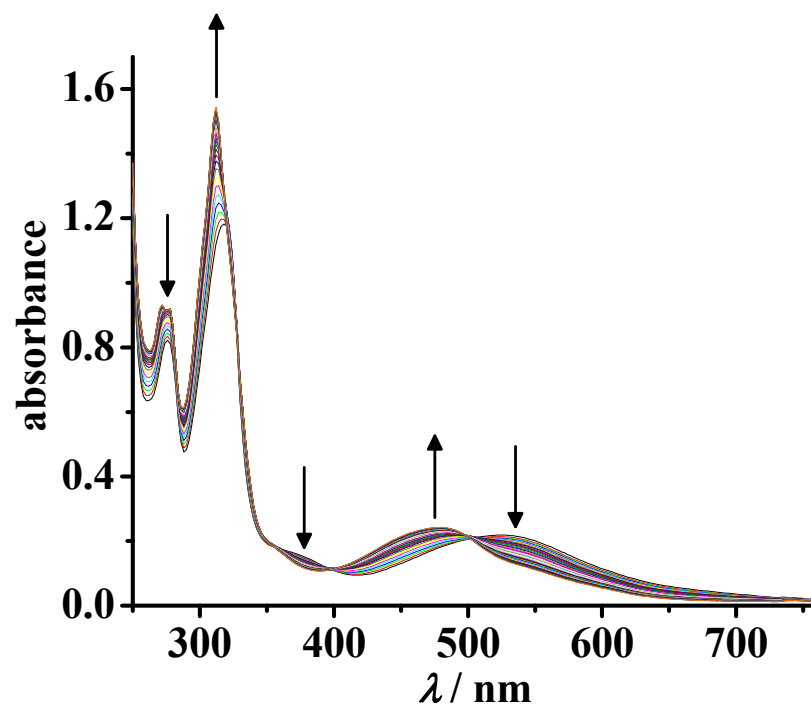

**Fig. S8** The change in electronic spectral profile of [1] ( $0.68 \times 10^{-4}$  M) in CH<sub>3</sub>CN/0.1 M HClO<sub>4</sub> (pH ~ 1)) with time (5 min time intervals) under a steady flow of O<sub>2</sub>.



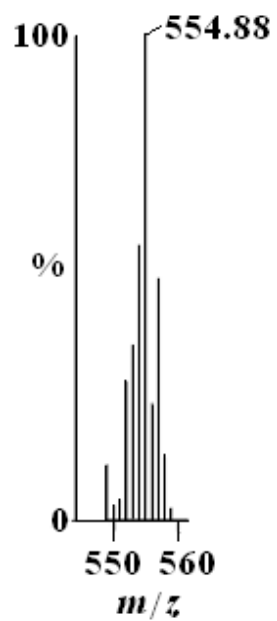

**Fig. S9** ESI-MS(+) spectrum of [(**1a-Cl**)+H]<sup>+</sup> in CH<sub>3</sub>CN.
